# Supplementary material for: The renin‐angiotensin‐aldosterone system and its suppression
Source: PubMed Central journal article supplement — J Vet Intern Med. 2019 Feb 26;33(2):363–82. doi: 10.1111/jvim.15454 (PMC6430926; doi:10.1111/jvim.15454), 2019-02-26
Supplement: JVIM-33-363-s002.pdf [file JVIM-33-363-s002.pdf]

The Renin Angiotensin Aldosterone System and its Suppression: Supplemental Figures

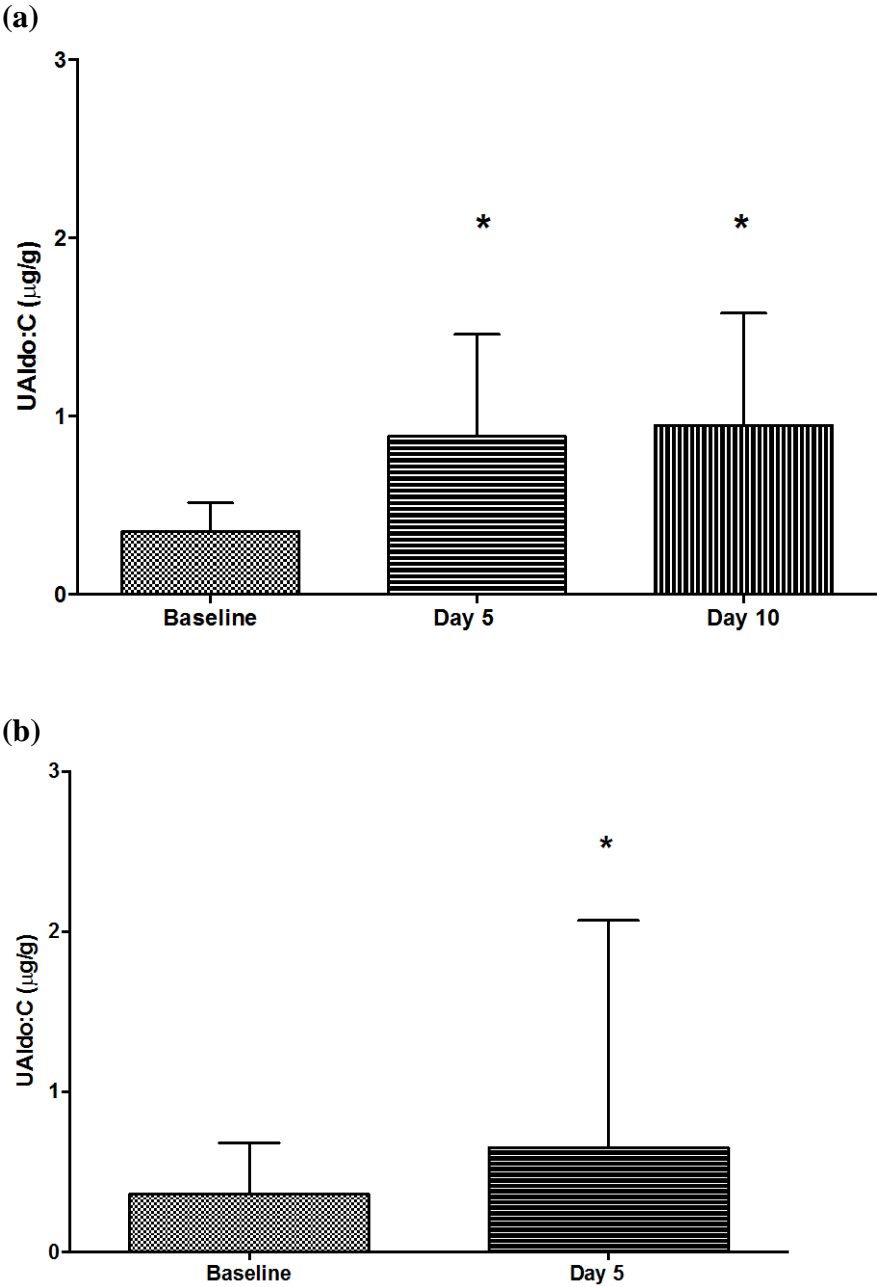

Supplemental Figure 1.

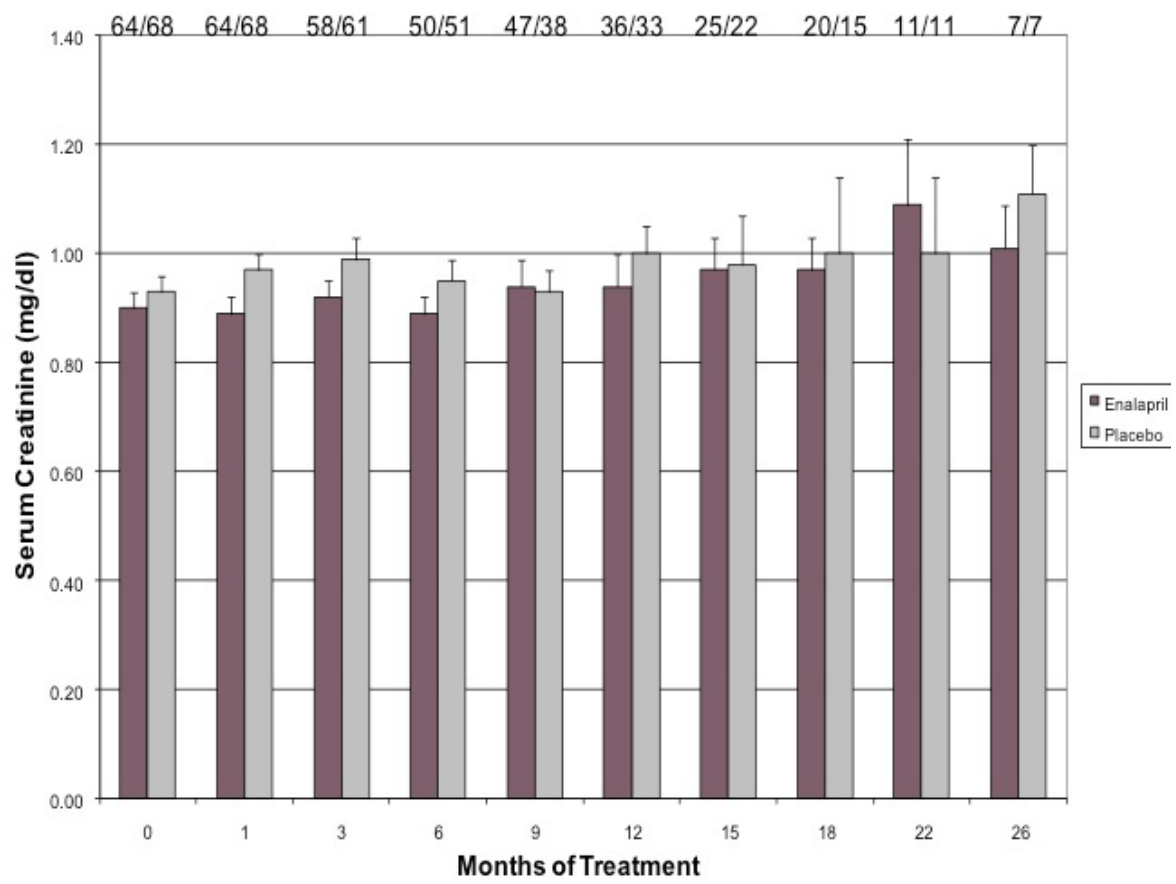

©Atkins 2012

Supplemental Figure 2.
