# Supplementary material for: The renin‐angiotensin‐aldosterone system and its suppression
Source: PubMed Central journal article supplement — J Vet Intern Med. 2019 Feb 26;33(2):363–82. doi: 10.1111/jvim.15454 (PMC6430926; doi:10.1111/jvim.15454), 2019-02-26
Supplement: JVIM-33-363-s004.pdf [file JVIM-33-363-s004.pdf]

**Table 2: Characteristics of specific ACE-Inhibitors.**

| ACE-Inhibitor<br>Species       | Pro-drug | Hypothesized Tissue-ACE Affinity | Excretory route<br>(Human Data) | Pharmacokinetics: Dog<br><br>Note: ET <sub>1/2</sub> is for active drug<br>See table 3 for ET <sub>1/2</sub> of benazeprilat, enalaprilat, imidiprilat, and ramiprilat | Dosage & Doses/Day<br>All dosages are oral<br>Note: unless indicated, dosage adjustment is recommended in CKD<br>(Human Data) |
|--------------------------------|----------|----------------------------------|---------------------------------|------------------------------------------------------------------------------------------------------------------------------------------------------------------------|-------------------------------------------------------------------------------------------------------------------------------|
| Quinapril <sup>1</sup><br>H    | Yes      | Highest 1                        | (U=61%;<br>F=37%)               | ----                                                                                                                                                                   | (10-20 mg/day)                                                                                                                |
| Benazepril <sup>2-4</sup><br>V | Yes      | Highest 1                        | U=45%;<br>F=55%                 | Rapid absorption & conversion to active drug with peak concentration at 2h                                                                                             | D & C: 0.25-0.5 mg/kg q24 to 12h; No (or less) dosage adjustment in stable CKD                                                |
| Ramipril <sup>2,5</sup><br>V   | Yes      | High 3                           | U~15%                           | Rapid absorption & conversion to active drug; renal impairment did not change pharmacokinetic parameters                                                               | D & C: 0.125-0.25 mg/kg q24h No (or less) dosage adjustment in stable CKD                                                     |
| Perindopril <sup>6</sup><br>H  | Yes      | High 4                           | (U=70%)                         | ----                                                                                                                                                                   | (2-4 mg/day; No dosage adjustment in stable CKD)                                                                              |
| Lisinopril <sup>2</sup><br>VR  | No       | High 5                           | U~100%                          | Bioavailability of 25-50%<br>Peak concentration at 4h<br>May have long duration of action                                                                              | D: 0.5mg/kg q24 to 12h<br>C: 0.25-0.5mg/kg q24h                                                                               |
| Enalapril <sup>2</sup><br>V    | Yes      | High 6                           | U=95%                           | Onset of action 4-6h Duration of action 12-14h                                                                                                                         | D: 0.5 mg/kg q24 to 12h<br>C: 0.25-0.5 mg/kg q24h                                                                             |
| Fosinopril <sup>7,8</sup><br>H | Yes      | High 7                           | (U = F)                         | ----                                                                                                                                                                   | (10-20 mg/day; No dosage adjustment in stable CKD)                                                                            |
| Captopril <sup>2</sup><br>VR   | No       | Lowest 8                         | U=95%                           | Bioavailability reduced by food<br>ET <sub>1/2</sub> = 2.8h; duration 3-4h                                                                                             | D: 0.5-2mg/kg q8h<br>C: 3.125-6.25mg q12 to 8h                                                                                |
| Alacepril <sup>9</sup><br>VR   | Yes      | Unknown                          | (U=60%)                         | ----                                                                                                                                                                   | D: 0.5mg/kg BID                                                                                                               |
| Imidapril <sup>2</sup><br>V    | Yes      | Unknown                          | U=40%<br>F=60%                  | Bioavailability reduced by food<br>Peak concentration of active drug at 5h                                                                                             | D: 0.25-0.5mg/kg q24h; No (or less) dosage adjustment in stable CKD                                                           |
| Moexipril <sup>7</sup>         | Yes      | Unknown                          | (F>U)                           | ----                                                                                                                                                                   | (7.5mg/day)                                                                                                                   |
| Trandopril <sup>7</sup>        | Yes      | Unknown >><br>Enalapril          | (U = 33%)<br>F=67%)             | ----                                                                                                                                                                   | (2mg/day)                                                                                                                     |

C, cat; CKD, chronic kidney disease; D, dog;  $ET_{1/2}$ , elimination half-life; F, fecal excretion; H, human marketed only; h, hour; V, veterinary and human marketed; Pr, protein; VR, veterinary research/clinical use – not marketed; U, urinary excretion; (*i*) – italicized in parentheses, human data; >>, much greater than

## References

1. Kelly JG, O'Malley K. Clinical Pharmacokinetics of the Newer ACE Inhibitors. *Clin Pharmacokinet.* 1990;19(3):177–96.
2. Plumb DC. Plumb's Veterinary Drug Handbook. 8 ed. Ames, Iowa: Wiley Blackwell; 2015.
3. Toutain PL, Lefebvre HP, King JN. Benazeprilat disposition and effect in dogs revisited with a pharmacokinetic/pharmacodynamic modeling approach. *J Pharmacol Exp Ther.* 2000;292(3):1087–93.
4. Lefebvre HP, Brown SA, Chetboul V, King JN, Pouchelon JL, Toutain PL. Angiotensin-converting enzyme inhibitors in veterinary medicine. *Curr Pharm Des.* 2007;13(13):1347–61.
5. Lefebvre HP, Jeunesse E, Laroute V, Toutain P-L. Pharmacokinetic and pharmacodynamic parameters of ramipril and ramiprilat in healthy dogs and dogs with reduced glomerular filtration rate. *J Vet Intern Med.* 2006 May;20(3):499–507.
6. MacFadyen RJ, Lees KR, Reid JL. Perindopril. A review of its pharmacokinetics and clinical pharmacology. *Drugs.* 1990;39 Suppl 1:49–63.
7. Song JC, White CM. Clinical pharmacokinetics and selective pharmacodynamics of new angiotensin converting enzyme inhibitors: an update. *Clin Pharmacokinet.* 2002;41(3):207–24.
8. Struthers A, 1992. The clinical pharmacology of angiotensin converting enzyme inhibitors in chronic heart failure. *Pharmac Ther.* 1992.
9. Sakatani A, Miyagawa Y, Takemura N. Evaluation of the effect of an angiotensin-converting enzyme inhibitor, alacepril, on drug-induced renin–angiotensin–aldosterone system activation in normal dogs. *J Vet Cardiol.* 2016 Sep;18(3):248–54.
