# Supplementary material for: The renin‐angiotensin‐aldosterone system and its suppression
Source: PubMed Central journal article supplement — J Vet Intern Med. 2019 Feb 26;33(2):363–82. doi: 10.1111/jvim.15454 (PMC6430926; doi:10.1111/jvim.15454), 2019-02-26
Supplement: JVIM-33-363-s005.pdf [file JVIM-33-363-s005.pdf]

**Table 3: Pharmacokinetic parameters of ACE-Inhibitors in dogs and cats.**

| <b>Drug</b>         | <b>Species, Route of Administration</b> | <b>Bmax (nmol/L)</b> | <b>Kd (nmol/L)</b> | <b>T<sub>1/2</sub>K<sub>10</sub> (min)</b> | <b>Clearance (free drug) (L/kg/h)</b> | <b>Bioavailability (%)</b> | <b>IC<sub>50</sub> (nmol/L)</b> |
|---------------------|-----------------------------------------|----------------------|--------------------|--------------------------------------------|---------------------------------------|----------------------------|---------------------------------|
| <b>Benazeprilat</b> | Dog, IV                                 | 119                  | 4.5                | 0.22                                       | 39                                    | 2.6                        | 0.28                            |
| <b>Enalaprilat</b>  | Dog, PO                                 | 161                  | 7.4                | ND                                         | 61                                    | ND                         | 1.09                            |
| <b>Imidaprilat</b>  | Dog, PO                                 | 129                  | 3.1                | ND                                         | 118                                   | ND                         | 2.78                            |
| <b>Ramiprilat</b>   | Dog, IV                                 | 142                  | 0.8                | 0.51                                       | 9.4                                   | 6.7                        | 0.40                            |
| <b>Benazeprilat</b> | Cat, IV                                 | 202                  | 3.5                | 0.13                                       | 59                                    | 3.2                        | 0.53-0.81                       |

ACE, angiotensin converting enzyme; Bmax, total binding capacity (circulating and tissular converting enzyme) scaled by volume of distribution; Kd, equilibrium dissociation constant (concentration of free ACE-inhibitor producing saturation of 50% of the ACE pool (circulating and tissular); T<sub>1/2</sub>K<sub>10</sub>, half-life of elimination of the free fraction; Bioavailability, absolute oral bioavailability; IC<sub>50</sub>, plasma concentration of free drug to obtain 50% of the maximal inhibition of ACE in vitro activity, a measure of drug potency. Re-printed with permission: Lefebvre HP, Brown SA, Chetboul V et al. *Current Pharmaceutical Design*, 2007, 13, 1347-1361; © Bentham Science Publishers
