# Supplementary material for: The renin‐angiotensin‐aldosterone system and its suppression
Source: PubMed Central journal article supplement — J Vet Intern Med. 2019 Feb 26;33(2):363–82. doi: 10.1111/jvim.15454 (PMC6430926; doi:10.1111/jvim.15454), 2019-02-26
Supplement: JVIM-33-363-s007.pdf [file JVIM-33-363-s007.pdf]

**Supplemental Table 5.** Clinical trials involving RAAS suppression in people with proteinuric kidney disease. Studies are presented in chronological order.

| <b>Disease</b>                                                                                                                                                            | <b>Treatment(s) Used in Experiments</b>                                                                  | <b>Outcomes</b>                                                                                                                                                                                                                                                                                                                                                                                                                                                               |
|---------------------------------------------------------------------------------------------------------------------------------------------------------------------------|----------------------------------------------------------------------------------------------------------|-------------------------------------------------------------------------------------------------------------------------------------------------------------------------------------------------------------------------------------------------------------------------------------------------------------------------------------------------------------------------------------------------------------------------------------------------------------------------------|
| Evaluation of renal outcomes from patients in the ONTARGET trial (coronary, peripheral, or cerebrovascular disease or diabetes with end-organ damage), follow-up ~5 years | Dual therapy with ACEI and ARB compared to mono-therapy with either ACEI or ARB                          | Dual therapy was shown to result in a greater reduction in proteinuria, yet was also associated with <i>worsening</i> of major renal outcomes (need for dialysis, increasing creatinine, and fall in estimated GFR). <sup>1,2</sup>                                                                                                                                                                                                                                           |
| Meta-analysis of studies of IgA nephropathy                                                                                                                               | Dual therapy with ACEI and ARB compared to mono-therapy with either ACEI or ARB                          | Patients receiving dual therapy experienced a greater reduction in proteinuria than patients on mono-therapy. There was, however, no difference in glomerular filtration rate between patients receiving monotherapy and those receiving dual therapy. Therefore, a reduction in proteinuria may not translate to protection from progression or improvement in renal or cardiovascular function in <i>all</i> patients or types of proteinuric renal disease. <sup>3,4</sup> |
| Type-2 diabetic nephropathy, follow-up ~33 months                                                                                                                         | Dual therapy with DRI and either ACEI or ARB compared to mono-therapy with placebo and either ACE or ARB | This trial was stopped early as more patients in the DRI groups reached the composite endpoint (included time to cardiovascular death, and multiple indices of worsening cardiovascular and kidney function. Patients in the DRI groups also had an increased risk of hyperkalemia and hypotension. <sup>5</sup>                                                                                                                                                              |
| Type-2 diabetic nephropathy, follow up – 42 months                                                                                                                        | Dual therapy with ACEI and ARB compared to mono-therapy with ARB and placebo                             | Dual therapy with an ACEI and ARB was associated with an increased incidence of hyperkalemia and acute kidney injury, when compared to therapy with an ARB alone, resulting                                                                                                                                                                                                                                                                                                   |

|                                                                                                                                               |                                                                                          |                                                                                                                                                                                                                                                              |
|-----------------------------------------------------------------------------------------------------------------------------------------------|------------------------------------------------------------------------------------------|--------------------------------------------------------------------------------------------------------------------------------------------------------------------------------------------------------------------------------------------------------------|
|                                                                                                                                               |                                                                                          | in early termination of the study. There was no benefit in either mortality or cardiovascular events at study termination. <sup>6</sup>                                                                                                                      |
| Diabetic nephropathy, treatment duration –18 months                                                                                           | Addition of spironolactone to ARB compared to placebo and ARB and ACEI                   | Reduction in the urine albumin to creatinine ratio was significantly greater in the spironolactone group; both groups had similar declines in estimated GFR. <sup>7</sup>                                                                                    |
| Chronic heart failure with reduced ejection fraction and mild to moderate chronic kidney disease                                              | Finerenone compared to spironolactone                                                    | Finerenone was associated with lower incidences of worsening renal failure and hyperkalemia; both MRAs led to reduction in B-type natriuretic peptide (BNP), amino-terminal proBNP, and albuminuria. <sup>8</sup>                                            |
| Systemic hypertension without diabetes, treatment duration –52 weeks                                                                          | Addition of low-dose eplerenone to ACE and/or ARB compared to placebo and ACE and/or ARB | Percent reduction in the urine albumin to creatinine ratio was significantly greater in the eplerenone group. <sup>9</sup>                                                                                                                                   |
| Chronic heart failure with reduced ejection fraction and type-2 diabetes mellitus and/or chronic kidney disease, treatment duration – 90 days | Finerenone compared to eplerenone                                                        | Finerenone was associated with a greater reduction in N-terminal proBNP, and fewer clinical events (death from any cause, cardiovascular hospitalizations, or emergency presentation for worsening heart failure) when compared to eplerenone. <sup>10</sup> |

ACEI, angiotensin converting enzyme inhibitor; ARB angiotensin II type-1 receptor blocker; BNP, B-type natriuretic peptide; DRI direct renin inhibitor; GFR glomerular filtration rate; MRA, mineralocorticoid receptor antagonist

## References

1. ONTARGET Investigators, Yusuf S, Teo KK, Pogue J, Dyal L, Copland I, et al. Telmisartan, ramipril, or both in patients at high risk for vascular events. *N Engl J Med.* 2008;358(15):1547–59.
2. Mann JF, Schmieder RE, McQueen M, Dyal L, Schumacher H, Pogue J, et al. Renal outcomes with telmisartan, ramipril,

or both, in people at high vascular risk (the ONTARGET study): a multicentre, randomised, double-blind, controlled trial. *The Lancet*. 2008;372(9638):547–53.

3. Kunz R, Friedrich C, Wolbers M, Mann JFE. Meta-analysis: effect of monotherapy and combination therapy with inhibitors of the renin angiotensin system on proteinuria in renal disease. *Ann Int Med*. 2008;148(1):30–48.
4. Cheng J, Zhang X, Tian J, Li Q, Chen J. Combination therapy an ACE inhibitor and an angiotensin receptor blocker for IgA nephropathy: a meta-analysis. *Int J Clin Prac*. 2012;66(10):917–23.
5. Parving H-H, Brenner BM, McMurray JJV, de Zeeuw D, Haffner SM, Solomon SD, et al. Cardiorenal End Points in a Trial of Aliskiren for Type 2 Diabetes. *N Engl J Med*. 2012;367(23):2204–13.
6. Fried LF, Emanuele N, Zhang JH, Brophy M, Conner TA, Duckworth W, et al. Combined Angiotensin Inhibition for the Treatment of Diabetic Nephropathy. *N Engl J Med*. 2013;369(20):1892–903.
7. Esteghamati A, Noshad S, Jarrah S, Mousavizadeh M, Khoee SH, Nakhjavani M. Long-term effects of addition of mineralocorticoid receptor antagonist to angiotensin II receptor blocker in patients with diabetic nephropathy: a randomized clinical trial. *Nephrol Dial Transplant*. 2013;28(11):2823–33.
8. Pitt B, Kober L, Ponikowski P, Gheorghiade M, Filippatos G, Krum H, et al. Safety and tolerability of the novel non-steroidal mineralocorticoid receptor antagonist BAY 94-8862 in patients with chronic heart failure and mild or moderate chronic kidney disease: a randomized, double-blind trial. *Eur Heart J*. 2013;34(31):2453–63.
9. Ando K, Ohtsu H, Uchida S, Kaname S. Anti-albuminuric effect of the aldosterone blocker eplerenone in non-diabetic hypertensive patients with albuminuria: a double-blind, randomised, placebo-controlled trial. *Lancet Diabetes Endocrinol*. 2014;2(12):944–53.
10. Filippatos G, Anker SD, Böhm M, Gheorghiade M, Køber L, Krum H, et al. A randomized controlled study of finerenone vs. eplerenone in patients with worsening chronic heart failure and diabetes mellitus and/or chronic kidney disease. *Eur Heart J*. 2016;37(27):2105–14.
